# Supplementary material
Source: PubMed Central journal article supplement (PMC2964201)
Supplement: 1005259107_pnas.201005259SI.pdf [file 1005259107_pnas.201005259SI.pdf]

# Supporting Information

Tchoukalova et al. 10.1073/pnas.1005259107

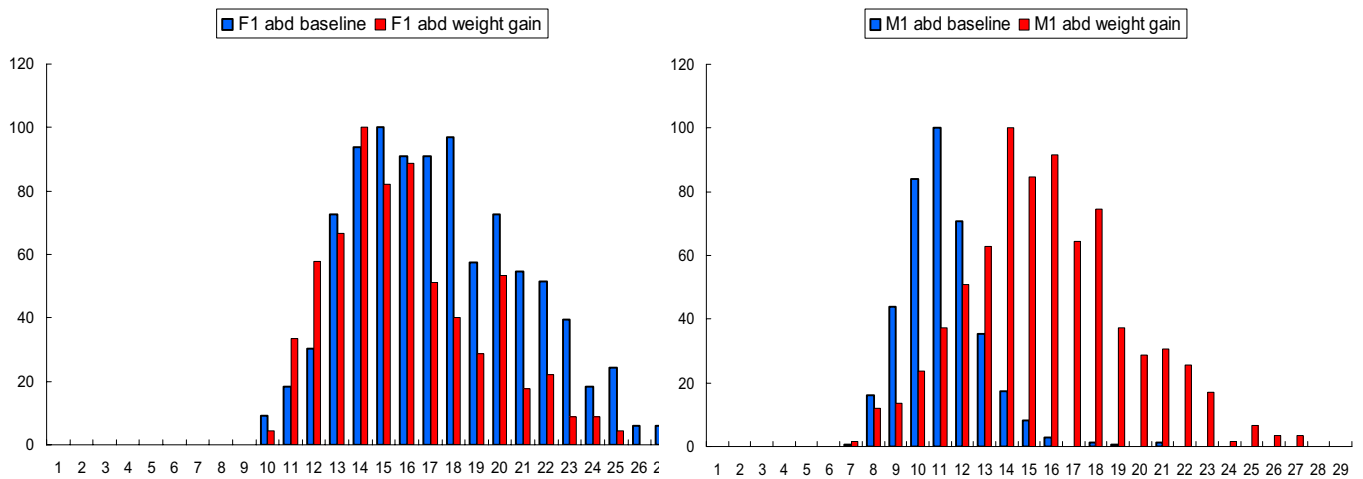

**Fig. S1.** Histograms of adipocyte size from (*Left*) the woman with the greatest decrease in abdominal cell size (F1) and (*Right*) the man with the greatest increase in abdominal adipocyte size (M1). The x axes represent bins with the relative number of cells. The bin width is 7  $\mu\text{m}$ , and the bin with the largest number of cells is set to 100; all other bins are relative to the largest bin. To avoid counting multiple lipid droplets in immature adipocytes as individual cells, cells  $<35 \mu\text{m}$  are not included.

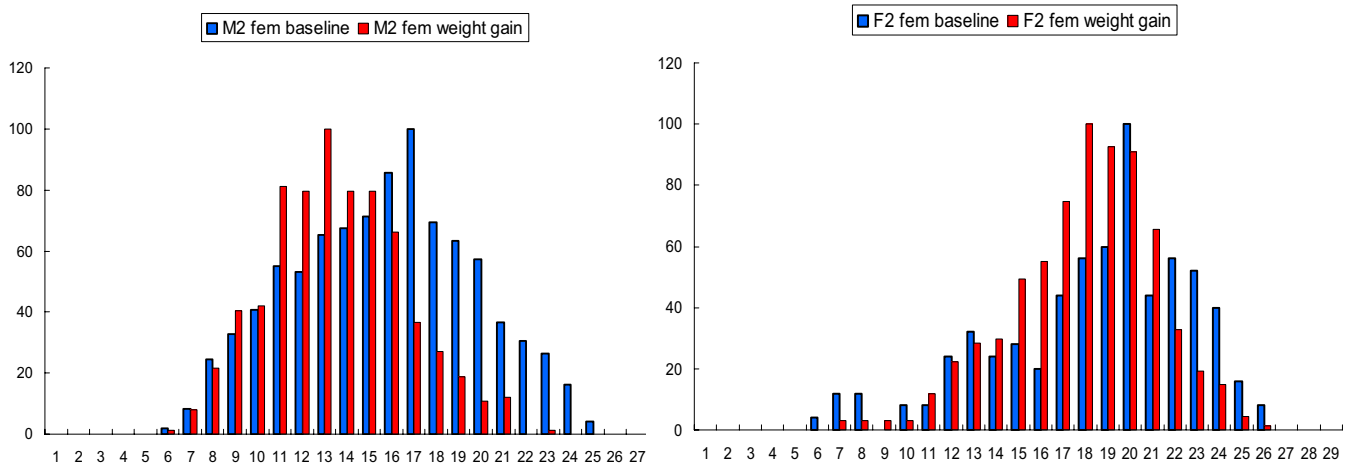

**Fig. S2.** Histograms of adipocyte size from (*Left*) the man (M2) and (*Right*) the woman (F2) with the greatest decreases in femoral cell size. The x axes represent bins with the relative number of cells. The bin width is 7  $\mu\text{m}$ , and the bin with the largest number of cells is set to 100; all other bins are relative to the largest bin. To avoid counting multiple lipid droplets in immature adipocytes as individual cells, cells  $<35 \mu\text{m}$  are not included.
